# Supplementary material for: Fabrication of carbon nanotube-multiporphyrin array composites as light-sensitizer for photocurrent generation, photochromism of viologen and catalytic degradation of methyl orange
Source: Royal Society of Chemistry journal article supplement (doi:10.1039/c8nj03780a), 2018-01-01
Supplement: c8nj03780a1.pdf [file c8nj03780a1.pdf]

Fabrication of Carbon Nanotube-Multiporphyrin Array Composites as Light-Sensitizer for Photocurrent Generation, Photochromism of Viologen and Catalytic Degradation of Methyl Orange

Jing Wang, Wen-Li He, Meng Chen, and Dong-Jin Qian

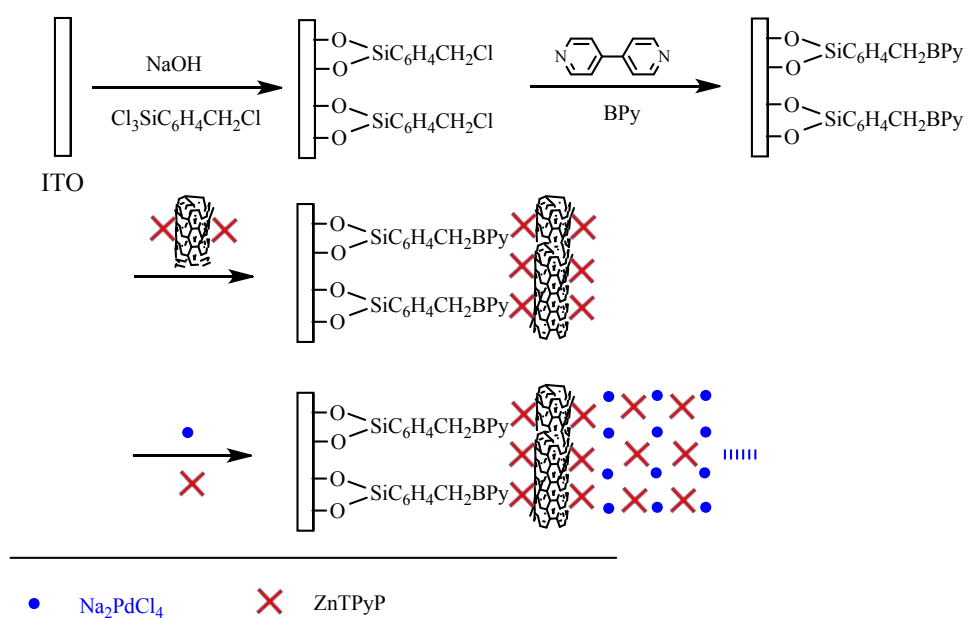

**Figure S1** Schematic drawing for the layer-by-layer assembly of MWNT-TBen@(ZnTPyP-Pd)<sub>3</sub> multilayers on the ITO electrode surface.

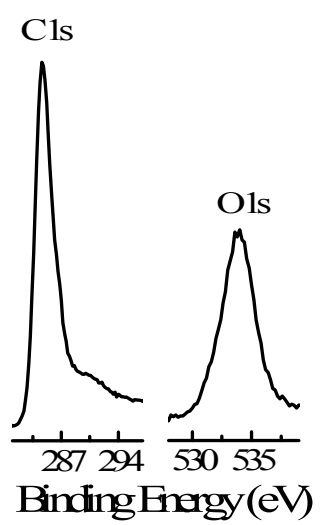

**Figure S2.** High resolution XPS spectra of the precursor of MWNT-OH.

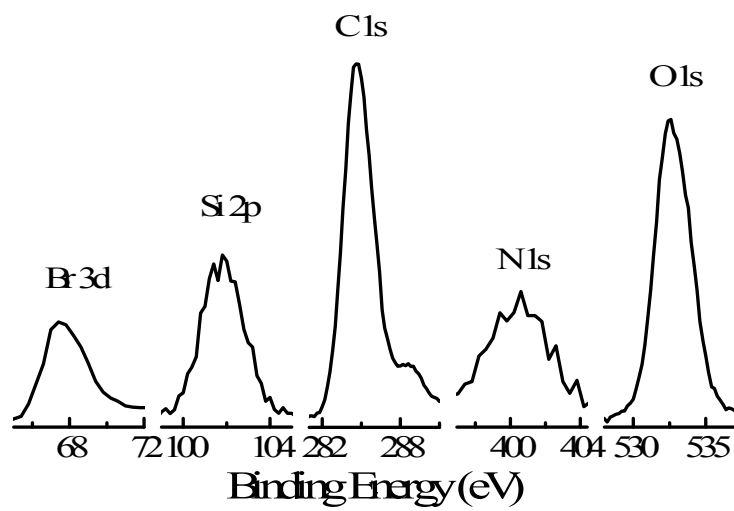

**Figure S3** High resolution XPS spectra of the MWNT-TBenBr nano-hybrids.

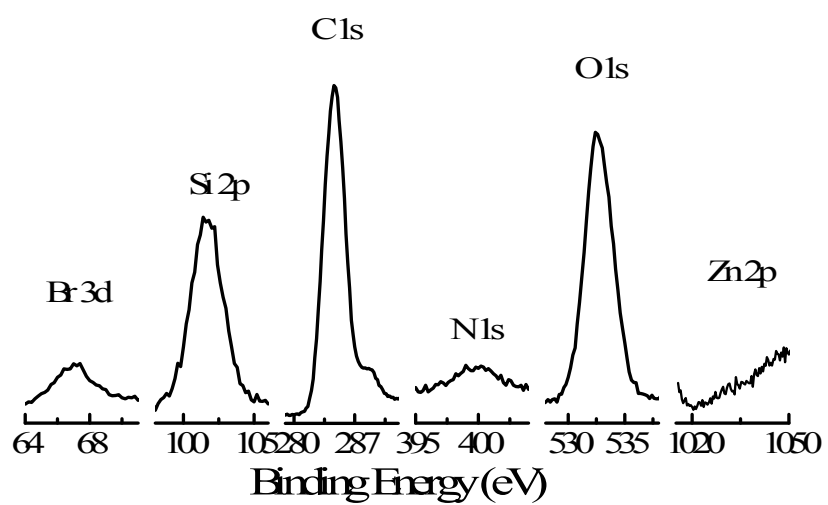

**Figure S4** High resolution XPS spectra of the MWNT-TBen@ZnTPyP nano-cores.

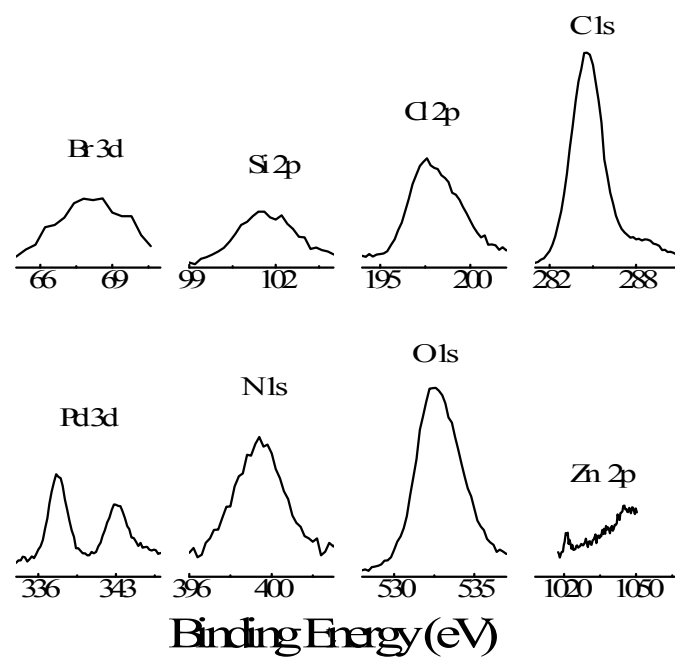

**Figure S5** High resolution XPS spectra of MWNT-TBen@(ZnTPyP-Pd)<sub>3</sub> nano-composites.

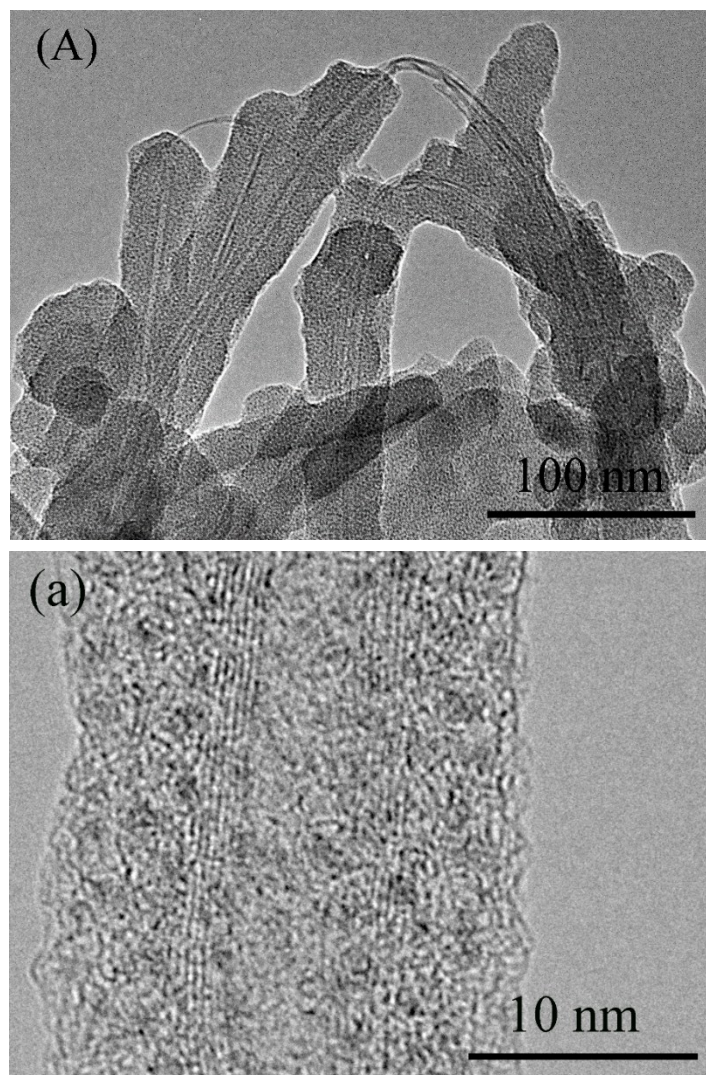

**Figure S6** (A) FE-TEM image of MWNT-TBen@(ZnTPyP-Pd)<sub>6</sub> nano-composites, and (a) the enlarged image of (A).

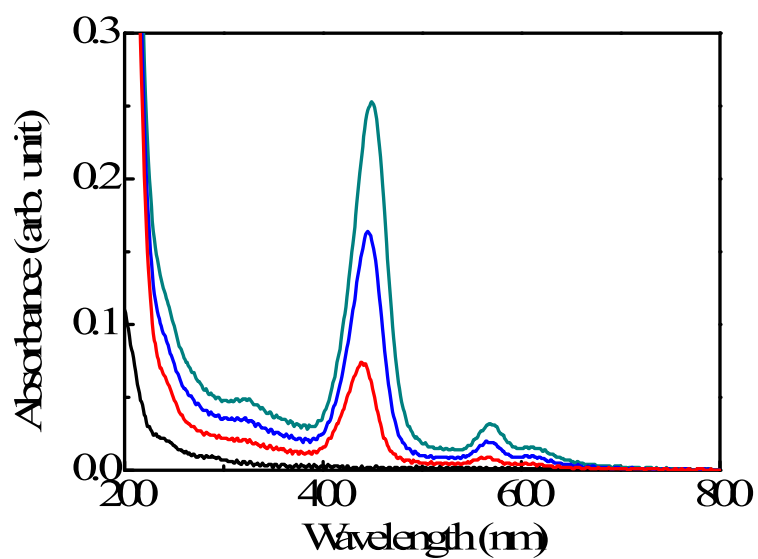

**Figure S7** UV-vis absorption spectra of quartz substrates covered with layers of pyridyl substituents and MWNT-TBen@(ZnTPyP-Pd)<sub>n</sub> multilayers. Bottom up: monolayer of bipyridyl, and then one to three layers of MWNT-TBen@(ZnTPyP-Pd)<sub>n</sub> (n = 1, 2, 3).

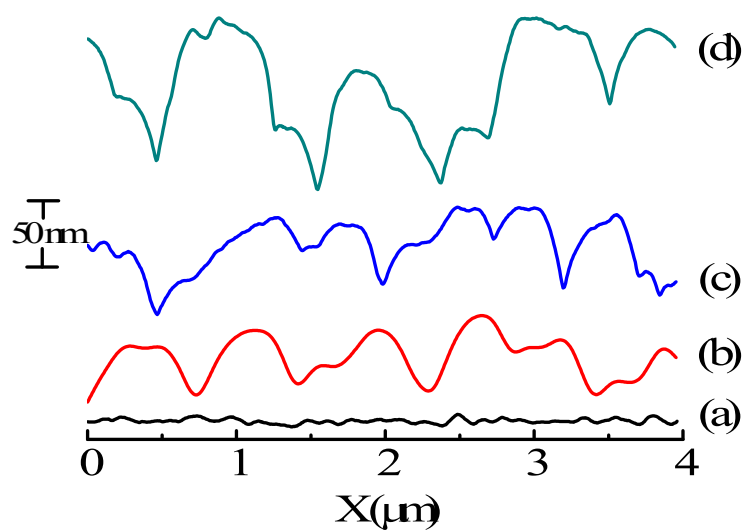

**Figure S8** Height profiles obtained from the AFM images of (a) PySH, (b) MWNT-TBen@ZnTPyP, (c) MWNT-TBen@(ZnTPyP-Pd)<sub>2</sub>, and (d) MWNT-TBen@(ZnTPyP-Pd)<sub>4</sub> multilayers on the gold surfaces.
